# Supplementary material for: Bed-sharing and risk of hospitalisation due to pneumonia and diarrhoea in infancy: the 2004 Pelotas Birth Cohort
Source: HighWire-hosted journal article supplement (doi:10.1136/jech-2012-201145), 2012-10-25
Supplement: jech-2012-201145supp_tables.pdf [file jech-2012-201145supp_tables.pdf]

**Supplemental Table 1.** Prevalence of bed-sharing at 3 months of age according to family, maternal and child characteristics (n = 3906).

| Variables                               | N    | Bed-sharing at 3 months |             |
|-----------------------------------------|------|-------------------------|-------------|
|                                         |      | %                       | 95% CI      |
| <b>Mother's skin colour</b>             |      |                         | P < 0.001*  |
| White                                   | 2808 | 40.8                    | 38.9-42.6   |
| Other                                   | 1020 | 61.3                    | 58.3-64.3   |
| <b>Mother's age</b>                     |      |                         | P < 0.001*  |
| < 20 years                              | 716  | 55.4                    | 51.7-59.0   |
| ≥ 20 years                              | 3110 | 44.2                    | 42.4-45.9   |
| <b>Family income (tertiles)</b>         |      |                         | P < 0.001** |
| 1 <sup>st</sup> (Poor)                  | 1240 | 61.7                    | 59.0-64.5   |
| 2 <sup>nd</sup>                         | 1298 | 47.4                    | 44.7-50.2   |
| 3 <sup>rd</sup>                         | 1281 | 30.1                    | 27.5-32.6   |
| <b>Mother living with partner</b>       |      |                         | P < 0.001*  |
| No                                      | 622  | 66.1                    | 62.2-69.9   |
| Yes                                     | 3284 | 42.6                    | 40.8-44.3   |
| <b>Maternal schooling level (years)</b> |      |                         | P < 0.001** |
| 0-4                                     | 575  | 66.4                    | 62.5-70.3   |
| 5-8                                     | 1552 | 54.6                    | 52.1-57.1   |
| 9 or more                               | 1664 | 32.4                    | 30.1-34.6   |
| <b>Paternal schooling level (years)</b> |      |                         | P < 0.001** |
| 0-4                                     | 521  | 64.1                    | 59.9-68.2   |
| 5-8                                     | 1051 | 53.6                    | 50.6-56.6   |
| 9 or more                               | 1426 | 30.9                    | 28.4-33.3   |
| <b>Parity</b>                           |      |                         | P < 0.001** |
| 1                                       | 1520 | 41.9                    | 39.4-44.5   |
| 2-3                                     | 1613 | 44.1                    | 41.6-46.5   |
| 4 or more                               | 694  | 61.0                    | 57.3-64.6   |

|                                                  |      |      |                       |
|--------------------------------------------------|------|------|-----------------------|
| <b>Interval between deliveries</b>               |      |      | <b>P &lt; 0.001**</b> |
| Primiparous                                      | 1520 | 41.9 | 39.4-44.5             |
| ≥ 24 months                                      | 1764 | 47.8 | 45.4-50.1             |
| < 24 months                                      | 318  | 57.5 | 51.9-63.1             |
| <b>Weight gain during pregnancy (tertiles)</b>   |      |      | <b>P &lt; 0.001*</b>  |
| 1 <sup>st</sup>                                  | 1320 | 51.9 | 49.2-54.7             |
| 2 <sup>nd</sup>                                  | 1279 | 40.2 | 37.5-42.9             |
| 3 <sup>rd</sup>                                  | 963  | 40.8 | 37.6-43.9             |
| <b>Total number of people living in the home</b> |      |      | <b>P &lt; 0.001*</b>  |
| 2-3                                              | 1150 | 39.5 | 36.6-42.3             |
| 4 or more                                        | 2598 | 49.3 | 47.3-51.2             |
| <b>Maternal smoking</b>                          |      |      | <b>P &lt; 0.001*</b>  |
| No                                               | 2799 | 41.9 | 40.0-43.7             |
| Yes                                              | 1029 | 58.2 | 55.2-61.3             |
| <b>Maternal history of asthma</b>                |      |      | <b>P = 0.001*</b>     |
| No                                               | 3027 | 44.9 | 43.1-46.7             |
| Yes                                              | 800  | 51.6 | 48.1-55.1             |
| <b>Infant's sex</b>                              |      |      | <b>P = 0.79</b>       |
| Male                                             | 1987 | 46.5 | 44.3-48.7             |
| Female                                           | 1841 | 46.0 | 43.7-48.3             |
| <b>Infant's skin colour</b>                      |      |      | <b>P &lt; 0.001*</b>  |
| White                                            | 2740 | 41.1 | 39.3-43.0             |
| Other                                            | 963  | 60.2 | 57.0-63.3             |
| <b>Type of delivery</b>                          |      |      | <b>P &lt; 0.001*</b>  |
| Normal                                           | 2113 | 52.9 | 50.8-55.1             |
| Caesarean                                        | 1715 | 38.1 | 35.8-40.4             |
| <b>Birth weight</b>                              |      |      | <b>P = 0.23*</b>      |
| < 2500                                           | 297  | 49.7 | 43.9-55.4             |
| ≥ 2500                                           | 3530 | 46.0 | 44.3-47.7             |
| <b>Gestational age at birth</b>                  |      |      | <b>P = 0.018*</b>     |
| < 37 weeks                                       | 481  | 51.4 | 46.8-55.9             |

|                                                               |      |      |            |
|---------------------------------------------------------------|------|------|------------|
| $\geq 37$ weeks                                               | 3343 | 45.6 | 43.9-47.3  |
| <b>Small for gestational age***</b>                           |      |      | P = 0.001* |
| No                                                            | 3377 | 45.3 | 43.6-47.0  |
| Yes                                                           | 447  | 53.6 | 49.0-58.3  |
| <b>Weight-for-age Z-score at 3 months of age &lt; -2.0</b>    |      |      | P = 0.006* |
| No                                                            | 3390 | 45.6 | 43.9-47.3  |
| Yes                                                           | 345  | 53.3 | 48.0-58.6  |
| <b>Length-for-age Z-score at 3 months of age &lt; -2.0</b>    |      |      | P < 0.001* |
| No                                                            | 3452 | 45.2 | 43.6-46.9  |
| Yes                                                           | 282  | 59.9 | 54.2-65.7  |
| <b>Weight-for-length Z-score at 3 months of age &lt; -2.0</b> |      |      | P = 0.13*  |
| No                                                            | 3554 | 46.6 | 45.0-48.2  |
| Yes                                                           | 181  | 40.9 | 33.7-48.1  |
| <b>Duration of breastfeeding****</b>                          |      |      | P = 0.012* |
| $\leq 3$ months of age                                        | 1323 | 43.4 | 40.7-46.1  |
| > 3 months of age                                             | 2505 | 47.8 | 45.8-49.7  |

\* Chi-square test

\*\* Chi-square test for trend

\*\*\* Birth weight below tenth percentile, according to the Williams weight-for-gestational age curve

\*\*\*\* Information on duration of breastfeeding obtained at age of 12 months

**Supplemental Table 2.** Incidence of hospitalisation due to pneumonia between 3 and 12 months of age according to family, maternal and child characteristics (n = 3906).

| Variables                               | Hospitalisation due to pneumonia |             |
|-----------------------------------------|----------------------------------|-------------|
|                                         | %                                | 95% CI      |
| <b>Mother's skin colour</b>             |                                  | P = 0.05*   |
| White                                   | 3.2                              | 2.6-3.8     |
| Other                                   | 4.6                              | 3.3-5.9     |
| <b>Mother's age</b>                     |                                  | P = 0.63*   |
| < 20 years                              | 3.9                              | 2.5-5.3     |
| ≥ 20 years                              | 3.5                              | 2.9-4.1     |
| <b>Family income (tertiles)</b>         |                                  | P = 0.001*  |
| 1 <sup>st</sup> (Poor)                  | 4.4                              | 3.3-5.6     |
| 2 <sup>nd</sup>                         | 4.4                              | 3.2-5.5     |
| 3 <sup>rd</sup>                         | 1.9                              | 1.1-2.7     |
| <b>Mother living with partner</b>       |                                  | P = 0.053*  |
| No                                      | 5.0                              | 3.2-6.7     |
| Yes                                     | 3.4                              | 2.7-4.0     |
| <b>Maternal schooling level (years)</b> |                                  | P < 0.001** |
| 0-4                                     | 5.2                              | 3.4-7.0     |
| 5-8                                     | 4.4                              | 3.4-5.4     |
| 9 or more                               | 2.4                              | 1.7-3.1     |
| <b>Paternal schooling level (years)</b> |                                  | P = 0.005*  |
| 0-4                                     | 4.4                              | 2.6-6.2     |
| 5-8                                     | 4.7                              | 3.4-5.9     |
| 9 or more                               | 2.4                              | 1.6-3.2     |
| <b>Parity</b>                           |                                  | P = 0.002*  |
| 1                                       | 2.8                              | 1.9-3.6     |
| 2-3                                     | 3.5                              | 2.6-4.4     |

|                                                  |     |                   |
|--------------------------------------------------|-----|-------------------|
| 4 or more                                        | 5.8 | 4.0-7.5           |
| <b>Interval between deliveries</b>               |     | <b>P = 0.031*</b> |
| Primiparous                                      | 2.8 | 2.0-3.7           |
| ≥ 24 months                                      | 4.1 | 3.2-5.0           |
| < 24 months                                      | 5.4 | 2.8-7.8           |
| <b>Weight gain during pregnancy (tertiles)</b>   |     | <b>P = 0.15*</b>  |
| 1 <sup>st</sup>                                  | 3.9 | 2.9-5.0           |
| 2 <sup>nd</sup>                                  | 2.7 | 1.8-3.5           |
| 3 <sup>rd</sup>                                  | 3.8 | 2.6-5.0           |
| <b>Total number of people living in the home</b> |     | <b>P = 0.009*</b> |
| 2-3                                              | 2.4 | 1.5-3.3           |
| 4 or more                                        | 4.2 | 3.4-4.9           |
| <b>Maternal smoking</b>                          |     | <b>P = 0.020*</b> |
| No                                               | 3.2 | 2.5-3.8           |
| Yes                                              | 4.8 | 3.5-6.1           |
| <b>Maternal history of asthma</b>                |     | <b>P = 0.017*</b> |
| No                                               | 3.2 | 2.6-3.9           |
| Yes                                              | 5.0 | 3.5-6.5           |
| <b>Infant's sex</b>                              |     | <b>P = 0.448*</b> |
| Male                                             | 3.8 | 2.9-4.7           |
| Female                                           | 3.4 | 2.5-4.2           |
| <b>Infant's skin colour</b>                      |     | <b>P = 0.252*</b> |
| White                                            | 3.4 | 2.7-4.0           |
| Other                                            | 4.2 | 2.6-6.8           |
| <b>Type of delivery</b>                          |     | <b>P = 0.087*</b> |
| Normal                                           | 4.1 | 3.2-4.9           |
| Caesarean                                        | 3.0 | 2.2-3.8           |
| <b>Birth weight</b>                              |     | <b>P = 0.007*</b> |
| < 2500                                           | 6.4 | 3.6-9.2           |
| ≥ 2500                                           | 3.4 | 2.8-3.9           |
| <b>Gestational age at birth</b>                  |     | <b>P = 0.009*</b> |

|                                                               |     |            |
|---------------------------------------------------------------|-----|------------|
| < 37 weeks                                                    | 5.6 | 3.5-7.7    |
| ≥ 37 weeks                                                    | 3.3 | 2.7-3.8    |
| <b>Small for gestational age</b>                              |     | P = 0.054* |
| No                                                            | 3.4 | 2.8-4.0    |
| Yes                                                           | 5.2 | 3.3-7.6    |
| <b>Weight-for-age Z-score at 3 months of age &lt; -2.0</b>    |     | P = 0.001* |
| No                                                            | 3.2 | 2.6-3.7    |
| Yes                                                           | 6.7 | 4.0-9.3    |
| <b>Length-for-age Z-score at 3 months of age &lt; -2.0</b>    |     | P < 0.001* |
| No                                                            | 3.2 | 2.5-3.7    |
| Yes                                                           | 8.5 | 5.2-11.8   |
| <b>Weight-for-length Z-score at 3 months of age &lt; -2.0</b> |     | P = 0.002* |
| No                                                            | 3.4 | 3.8-11.7   |
| Yes                                                           | 7.7 | 2.7-3.9    |
| <b>Duration of breastfeeding</b>                              |     | P = 0.001* |
| ≤ 3 months of age                                             | 5.1 | 3.9-6.4    |
| > 3 months of age                                             | 2.8 | 2.2-3.6    |
| <b>Bed-sharing at 3 months of age</b>                         |     | P = 0.003* |
| No                                                            | 2.8 | 2.1-3.5    |
| Yes                                                           | 4.6 | 3.6-5.6    |

---

\* Chi-square test

\*\* Chi-square test for trend

**Supplemental Table 3.** Incidence of hospitalisation due to diarrhoea between 3 and 12 months of age according to family, maternal and child characteristics (n = 3906).

| Variables                               | Hospitalisation due to diarrhoea |             |
|-----------------------------------------|----------------------------------|-------------|
|                                         | %                                | 95% CI      |
| <b>Mother's skin colour</b>             |                                  | P = 0.45*   |
| White                                   | 0.8                              | 0.5-1.2     |
| Other                                   | 1.1                              | 0.4-1.7     |
| <b>Mother's age</b>                     |                                  | P = 0.78*   |
| < 20 years                              | 1.0                              | 0.2-1.7     |
| ≥ 20 years                              | 0.9                              | 0.5-1.2     |
| <b>Family income (tertiles)</b>         |                                  | P = 0.002*  |
| 1 <sup>st</sup> (Poor)                  | 1.6                              | 0.9-2.3     |
| 2 <sup>nd</sup>                         | 0.8                              | 0.2-1.2     |
| 3 <sup>rd</sup>                         | 0.3                              | 0.0-0.6     |
| <b>Mother living with partner</b>       |                                  | P = 0.77*   |
| No                                      | 1.0                              | 0.2-1.8     |
| Yes                                     | 0.9                              | 0.5-1.2     |
| <b>Maternal schooling level (years)</b> |                                  | P < 0.001** |
| 0-4                                     | 1.9                              | 0.7-3.0     |
| 5-8                                     | 1.2                              | 0.6-1.8     |
| 9 or more                               | 0.2                              | 0.0-0.3     |
| <b>Paternal schooling level (years)</b> |                                  | P < 0.001** |
| 0-4                                     | 2.1                              | 0.8-3.3     |
| 5-8                                     | 1.0                              | 0.4-1.7     |
| 9 or more                               | 0.3                              | 0.0-0.6     |
| <b>Parity</b>                           |                                  | P = 0.62*   |
| 1                                       | 0.9                              | 0.4-1.3     |
| 2-3                                     | 0.7                              | 0.3-1.2     |

|                                                  |     |                   |
|--------------------------------------------------|-----|-------------------|
| 4 or more                                        | 1.2 | 0.3-1.9           |
| <b>Interval between deliveries</b>               |     | <b>P = 0.002*</b> |
| Primiparous                                      | 0.9 | 0.5-1.5           |
| ≥ 24 months                                      | 0.6 | 0.2-0.9           |
| < 24 months                                      | 2.5 | 0.7-4.2           |
| <b>Weight gain during pregnancy (tertiles)</b>   |     | <b>P = 0.53*</b>  |
| 1 <sup>st</sup>                                  | 0.7 | 0.2-1.1           |
| 2 <sup>nd</sup>                                  | 1.1 | 0.5-1.7           |
| 3 <sup>rd</sup>                                  | 0.9 | 3.2-1.5           |
| <b>Total number of people living in the home</b> |     | <b>P = 0.14*</b>  |
| 2-3                                              | 1.2 | 0.6-1.8           |
| 4 or more                                        | 0.7 | 0.4-1.1           |
| <b>Maternal smoking</b>                          |     | <b>P = 0.13*</b>  |
| No                                               | 0.8 | 0.4-1.1           |
| Yes                                              | 1.3 | 0.6-1.9           |
| <b>Maternal history of asthma</b>                |     | <b>P = 0.64*</b>  |
| No                                               | 0.8 | 0.5-1.1           |
| Yes                                              | 1.0 | 0.3-1.7           |
| <b>Infant's sex</b>                              |     | <b>P = 0.904*</b> |
| Male                                             | 0.9 | 0.4-0.13          |
| Female                                           | 0.9 | 0.4-12.9          |
| <b>Infant's skin colour</b>                      |     | <b>P = 0.058*</b> |
| White                                            | 0.7 | 0.4-1.0           |
| Other                                            | 1.4 | 0.6-2.1           |
| <b>Type of delivery</b>                          |     | <b>P = 0.439*</b> |
| Normal                                           | 0.9 | 0.5-1.4           |
| Caesarean                                        | 0.8 | 0.3-1.2           |
| <b>Birth weight</b>                              |     | <b>P = 0.128*</b> |
| < 2500                                           | 1.7 | 0.2-3.1           |
| ≥ 2500                                           | 0.8 | 0.5-1.1           |
| <b>Gestational age at birth</b>                  |     | <b>P = 0.707*</b> |



|                                                               |     |            |
|---------------------------------------------------------------|-----|------------|
| < 37 weeks                                                    | 1.0 | 0.1-1.9    |
| ≥ 37 weeks                                                    | 0.9 | 0.5-1.1    |
| <b>Small for gestational age</b>                              |     | P = 0.031* |
| No                                                            | 0.8 | 0.5-1.1    |
| Yes                                                           | 1.8 | 0.8-3.5    |
| <b>Weight-for-age Z-score at 3 months of age &lt; -2.0</b>    |     | P = 0.002* |
| No                                                            | 2.3 | 0.7-3.9    |
| Yes                                                           | 0.7 | 0.4-0.9    |
| <b>Length-for-age Z-score at 3 months of age &lt; -2.0</b>    |     | P = 0.7*   |
| No                                                            | 1.1 | 0.0-2.3    |
| Yes                                                           | 0.8 | 0.5-1.1    |
| <b>Weight-for-length Z-score at 3 months of age &lt; -2.0</b> |     | P = 0.20*  |
| No                                                            | 1.7 | 0.0-3.5    |
| Yes                                                           | 0.8 | 0.5-1.1    |
| <b>Duration of breastfeeding</b>                              |     | P = 0.045* |
| ≤ 3 months of age                                             | 1.3 | 0.7-2.0    |
| > 3 months of age                                             | 0.7 | 0.4-1.1    |
| <b>Bed-sharing at 3 months of age</b>                         |     | P = 0.04*  |
| No                                                            | 0.6 | 0.4-0.9    |
| Yes                                                           | 1.2 | 0.7-1.7    |

---

\* Chi-square test

\*\* Chi-square test for trend
